# Supplementary material for: Association of microRNAs With Embryo Development and Fertilization in Women Undergoing Subfertility Treatments: A Pilot Study
Source: Front Reprod Health. 2021 Sep 23;3:719326. doi: 10.3389/frph.2021.719326 (PMC9580729; doi:10.3389/frph.2021.719326)
Supplement: Supplementary file 5 [file Table_2.XLS]

## Sheet: Sheet0
© 2000-2021 QIAGEN. All rights reserved.				nnnnc
ID	Symbol	Source	Confidence	Symbol	Pathway
hsa-miR-1260a	miR-1260a (and other miRNAs w/seed UCCCACC)	TargetScan Human	High (predicted)	ACO1	Iron homeostasis signaling pathway,Mitochondrial Dysfunction,TCA Cycle II (Eukaryotic)
hsa-miR-1260a	miR-1260a (and other miRNAs w/seed UCCCACC)	TargetScan Human	High (predicted)	ACP2	NAD Phosphorylation and Dephosphorylation,NAD Salvage Pathway II
hsa-miR-1260a	miR-1260a (and other miRNAs w/seed UCCCACC)	TargetScan Human	High (predicted)	ACVR1B	Cardiac Hypertrophy Signaling (Enhanced),Epithelial Adherens Junction Signaling,Factors Promoting Cardiogenesis in Vertebrates,FAT10 Cancer Signaling Pathway,Hepatic Fibrosis Signaling Pathway,Neuroinflammation Signaling Pathway,PPARα/RXRα Activation,Senescence Pathway,T Cell Exhaustion Signaling Pathway,TGF-β Signaling,Th1 and Th2 Activation Pathway,Th2 Pathway,WNT/β-catenin Signaling
hsa-miR-1260a	miR-1260a (and other miRNAs w/seed UCCCACC)	TargetScan Human	High (predicted)	ADAM7	Axonal Guidance Signaling
hsa-miR-1260a	miR-1260a (and other miRNAs w/seed UCCCACC)	TargetScan Human	High (predicted)	AGO1	CSDE1 Signaling Pathway,EIF2 Signaling,HOTAIR Regulatory Pathway,Inhibition of ARE-Mediated mRNA Degradation Pathway,Insulin Secretion Signaling Pathway,Regulation of eIF4 and p70S6K Signaling
hsa-miR-1260a	miR-1260a (and other miRNAs w/seed UCCCACC)	TargetScan Human	High (predicted)	ARFIP2	Huntington's Disease Signaling,Paxillin Signaling,Phagosome Formation,RAC Signaling,Signaling by Rho Family GTPases
hsa-miR-1260a	miR-1260a (and other miRNAs w/seed UCCCACC)	TargetScan Human	High (predicted)	ARRB2	Clathrin-mediated Endocytosis Signaling,IL-8 Signaling,Opioid Signaling Pathway,Role of Tissue Factor in Cancer,Sonic Hedgehog Signaling
hsa-miR-1260a	miR-1260a (and other miRNAs w/seed UCCCACC)	TargetScan Human	High (predicted)	ATF6B	PI3K Signaling in B Lymphocytes
hsa-miR-1260a	miR-1260a (and other miRNAs w/seed UCCCACC)	TargetScan Human	High (predicted)	BDH2	Ketogenesis,Ketolysis,Stearate Biosynthesis I (Animals)
hsa-miR-1260a	miR-1260a (and other miRNAs w/seed UCCCACC)	TargetScan Human	High (predicted)	BRK1	Actin Cytoskeleton Signaling,RAC Signaling
hsa-miR-1260a	miR-1260a (and other miRNAs w/seed UCCCACC)	TargetScan Human	High (predicted)	CACNG6	Amyotrophic Lateral Sclerosis Signaling,Androgen Signaling,Calcium Signaling,Cardiac Hypertrophy Signaling,Cardiac Hypertrophy Signaling (Enhanced),Cardiac β-adrenergic Signaling,CCR5 Signaling in Macrophages,Cellular Effects of Sildenafil (Viagra),Corticotropin Releasing Hormone Signaling,CREB Signaling in Neurons,Dilated Cardiomyopathy Signaling Pathway,Dopamine-DARPP32 Feedback in cAMP Signali…
hsa-miR-1260a	miR-1260a (and other miRNAs w/seed UCCCACC)	TargetScan Human	High (predicted)	CAP1	Ephrin B Signaling
hsa-miR-1260a	miR-1260a (and other miRNAs w/seed UCCCACC)	TargetScan Human	High (predicted)	CDC25A	3-phosphoinositide Biosynthesis,3-phosphoinositide Degradation,ATM Signaling,Cell Cycle: G1/S Checkpoint Regulation,Cyclins and Cell Cycle Regulation,D-myo-inositol (1,4,5,6)-Tetrakisphosphate Biosynthesis,D-myo-inositol (3,4,5,6)-tetrakisphosphate Biosynthesis,D-myo-inositol-5-phosphate Metabolism,Estrogen-mediated S-phase Entry,IL-7 Signaling Pathway,Mitotic Roles of Polo-Like Kinase,Molecular …
hsa-miR-1260a	miR-1260a (and other miRNAs w/seed UCCCACC)	TargetScan Human	High (predicted)	CHRM1	AMPK Signaling,Breast Cancer Regulation by Stathmin1,cAMP-mediated signaling,CREB Signaling in Neurons,eNOS Signaling,G-Protein Coupled Receptor Signaling,Gαq Signaling,Gαs Signaling,Nitric Oxide Signaling in the Cardiovascular System,Phagosome Formation
hsa-miR-1260a	miR-1260a (and other miRNAs w/seed UCCCACC)	TargetScan Human	High (predicted)	CIAO2A	Iron homeostasis signaling pathway
hsa-miR-1260a	miR-1260a (and other miRNAs w/seed UCCCACC)	TargetScan Human	High (predicted)	CMKLR1	Breast Cancer Regulation by Stathmin1,CREB Signaling in Neurons,Phagosome Formation
hsa-miR-1260a	miR-1260a (and other miRNAs w/seed UCCCACC)	TargetScan Human	High (predicted)	CSNK2B	Amyloid Processing,Clathrin-mediated Endocytosis Signaling,EGF Signaling,IGF-1 Signaling,IL-2 Signaling,IL-6 Signaling,NF-κB Signaling,PD-1, PD-L1 cancer immunotherapy pathway,PDGF Signaling,PTEN Signaling,RAR Activation,WNT/β-catenin Signaling
hsa-miR-1260a	miR-1260a (and other miRNAs w/seed UCCCACC)	TargetScan Human	High (predicted)	CYP4X1	Acetone Degradation I (to Methylglyoxal),Bupropion Degradation,Estrogen Biosynthesis,Histidine Degradation VI,Melatonin Degradation I,Nicotine Degradation II,Nicotine Degradation III,Pregnenolone Biosynthesis,Superpathway of Melatonin Degradation,Ubiquinol-10 Biosynthesis (Eukaryotic)
hsa-miR-1260a	miR-1260a (and other miRNAs w/seed UCCCACC)	TargetScan Human	High (predicted)	DAXX	Death Receptor Signaling,Induction of Apoptosis by HIV1,Molecular Mechanisms of Cancer,p38 MAPK Signaling,SAPK/JNK Signaling,Sumoylation Pathway
hsa-miR-1260a	miR-1260a (and other miRNAs w/seed UCCCACC)	TargetScan Human	High (predicted)	DBN1	Gap Junction Signaling
hsa-miR-1260a	miR-1260a (and other miRNAs w/seed UCCCACC)	TargetScan Human	High (predicted)	DCX	Reelin Signaling in Neurons
hsa-miR-1260a	miR-1260a (and other miRNAs w/seed UCCCACC)	TargetScan Human	High (predicted)	DHCR24	Cholesterol Biosynthesis I,Cholesterol Biosynthesis II (via 24,25-dihydrolanosterol),Cholesterol Biosynthesis III (via Desmosterol),Senescence Pathway,Stearate Biosynthesis I (Animals),Superpathway of Cholesterol Biosynthesis
hsa-miR-1260a	miR-1260a (and other miRNAs w/seed UCCCACC)	TargetScan Human	High (predicted)	DHX29	Pyrimidine Ribonucleotides De Novo Biosynthesis,Pyrimidine Ribonucleotides Interconversion
hsa-miR-1260a	miR-1260a (and other miRNAs w/seed UCCCACC)	TargetScan Human	High (predicted)	DNAJB12	Aldosterone Signaling in Epithelial Cells,NRF2-mediated Oxidative Stress Response,Protein Ubiquitination Pathway,Unfolded protein response
hsa-miR-1260a	miR-1260a (and other miRNAs w/seed UCCCACC)	TargetScan Human	High (predicted)	DNAJB2	Aldosterone Signaling in Epithelial Cells,NRF2-mediated Oxidative Stress Response,Protein Ubiquitination Pathway,Unfolded protein response
hsa-miR-1260a	miR-1260a (and other miRNAs w/seed UCCCACC)	TargetScan Human	High (predicted)	DSTYK	IL-15 Production,Sperm Motility
hsa-miR-1260a	miR-1260a (and other miRNAs w/seed UCCCACC)	TargetScan Human	High (predicted)	ENAH	Netrin Signaling
hsa-miR-1260a	miR-1260a (and other miRNAs w/seed UCCCACC)	TargetScan Human	High (predicted)	ENSA	Kinetochore Metaphase Signaling Pathway
hsa-miR-1260a	miR-1260a (and other miRNAs w/seed UCCCACC)	TargetScan Human	High (predicted)	EPHA10	Axonal Guidance Signaling,Ephrin A Signaling,Ephrin Receptor Signaling,Synaptogenesis Signaling Pathway
hsa-miR-1260a	miR-1260a (and other miRNAs w/seed UCCCACC)	TargetScan Human	High (predicted)	ETS1	B Cell Receptor Signaling,ERK/MAPK Signaling,GM-CSF Signaling,HER-2 Signaling in Breast Cancer,HGF Signaling,MSP-RON Signaling In Cancer Cells Pathway,Regulation Of The Epithelial Mesenchymal Transition By Growth Factors Pathway,Regulation of the Epithelial-Mesenchymal Transition Pathway,Renal Cell Carcinoma Signaling,Senescence Pathway,Sumoylation Pathway,Telomerase Signaling
hsa-miR-1260a	miR-1260a (and other miRNAs w/seed UCCCACC)	TargetScan Human	High (predicted)	ETS2	ERK/MAPK Signaling,HER-2 Signaling in Breast Cancer,HGF Signaling,MSP-RON Signaling In Cancer Cells Pathway,Role of OCT4 in Mammalian Embryonic Stem Cell Pluripotency,Senescence Pathway,Telomerase Signaling
hsa-miR-1260a	miR-1260a (and other miRNAs w/seed UCCCACC)	TargetScan Human	High (predicted)	EXOSC10	Inhibition of ARE-Mediated mRNA Degradation Pathway
hsa-miR-1260a	miR-1260a (and other miRNAs w/seed UCCCACC)	TargetScan Human	High (predicted)	FOSB	CDK5 Signaling,Opioid Signaling Pathway
hsa-miR-1260a	miR-1260a (and other miRNAs w/seed UCCCACC)	TargetScan Human	High (predicted)	FOXM1	Breast Cancer Regulation by Stathmin1,HOTAIR Regulatory Pathway
hsa-miR-1260a	miR-1260a (and other miRNAs w/seed UCCCACC)	TargetScan Human	High (predicted)	GJA5	Factors Promoting Cardiogenesis in Vertebrates,Gap Junction Signaling
hsa-miR-1260a	miR-1260a (and other miRNAs w/seed UCCCACC)	TargetScan Human	High (predicted)	GLP1R	Breast Cancer Regulation by Stathmin1,cAMP-mediated signaling,CREB Signaling in Neurons,G-Protein Coupled Receptor Signaling,GPCR-Mediated Integration of Enteroendocrine Signaling Exemplified by an L Cell,Gustation Pathway,Gαs Signaling,Insulin Secretion Signaling Pathway,Phagosome Formation
hsa-miR-1260a	miR-1260a (and other miRNAs w/seed UCCCACC)	TargetScan Human	High (predicted)	GPKOW	Spliceosomal Cycle
hsa-miR-1260a	miR-1260a (and other miRNAs w/seed UCCCACC)	TargetScan Human	High (predicted)	GPR182	Adrenomedullin signaling pathway,Breast Cancer Regulation by Stathmin1,CREB Signaling in Neurons,Phagosome Formation
hsa-miR-1260a	miR-1260a (and other miRNAs w/seed UCCCACC)	TargetScan Human	High (predicted)	GPR26	Breast Cancer Regulation by Stathmin1,CREB Signaling in Neurons,Phagosome Formation
hsa-miR-1260a	miR-1260a (and other miRNAs w/seed UCCCACC)	TargetScan Human	High (predicted)	GPR68	Breast Cancer Regulation by Stathmin1,CREB Signaling in Neurons,Phagosome Formation
hsa-miR-1260a	miR-1260a (and other miRNAs w/seed UCCCACC)	TargetScan Human	High (predicted)	GPRC5B	Breast Cancer Regulation by Stathmin1,CREB Signaling in Neurons,Phagosome Formation
hsa-miR-1260a	miR-1260a (and other miRNAs w/seed UCCCACC)	TargetScan Human	High (predicted)	GREM1	BMP signaling pathway,Osteoarthritis Pathway
hsa-miR-1260a	miR-1260a (and other miRNAs w/seed UCCCACC)	TargetScan Human	High (predicted)	GRK4	cAMP-mediated signaling,G-Protein Coupled Receptor Signaling,Opioid Signaling Pathway,Pyridoxal 5'-phosphate Salvage Pathway,Salvage Pathways of Pyrimidine Ribonucleotides
hsa-miR-1260a	miR-1260a (and other miRNAs w/seed UCCCACC)	TargetScan Human	High (predicted)	HDAC11	Adipogenesis pathway,Bladder Cancer Signaling,Calcium Signaling,Cardiac Hypertrophy Signaling (Enhanced),Cell Cycle: G1/S Checkpoint Regulation,Chronic Myeloid Leukemia Signaling,Coronavirus Pathogenesis Pathway,Cyclins and Cell Cycle Regulation,Glioma Signaling,Hereditary Breast Cancer Signaling,Huntington's Disease Signaling,Molecular Mechanisms of Cancer,Non-Small Cell Lung Cancer Signaling,Ov…
hsa-miR-1260a	miR-1260a (and other miRNAs w/seed UCCCACC)	TargetScan Human	High (predicted)	HNRNPA1	Coronavirus Replication Pathway,EIF2 Signaling,Telomere Extension by Telomerase
hsa-miR-1260a	miR-1260a (and other miRNAs w/seed UCCCACC)	TargetScan Human	High (predicted)	HSPA12B	Aldosterone Signaling in Epithelial Cells,Protein Ubiquitination Pathway
hsa-miR-1260a	miR-1260a (and other miRNAs w/seed UCCCACC)	TargetScan Human	High (predicted)	IFITM10	Coronavirus Replication Pathway
hsa-miR-1260a	miR-1260a (and other miRNAs w/seed UCCCACC)	TargetScan Human	High (predicted)	IGFBP4	Hepatic Fibrosis / Hepatic Stellate Cell Activation,IGF-1 Signaling
hsa-miR-1260a	miR-1260a (and other miRNAs w/seed UCCCACC)	TargetScan Human	High (predicted)	IL31	Airway Pathology in Chronic Obstructive Pulmonary Disease,Cardiac Hypertrophy Signaling (Enhanced),Erythropoietin Signaling Pathway,Hepatic Cholestasis,HMGB1 Signaling,IL-17 Signaling,Role of Pattern Recognition Receptors in Recognition of Bacteria and Viruses,Systemic Lupus Erythematosus In B Cell Signaling Pathway,Th1 and Th2 Activation Pathway,Th2 Pathway
hsa-miR-1260a	miR-1260a (and other miRNAs w/seed UCCCACC)	TargetScan Human	High (predicted)	IL36RN	Acute Phase Response Signaling,Adrenomedullin signaling pathway,Agranulocyte Adhesion and Diapedesis,Altered T Cell and B Cell Signaling in Rheumatoid Arthritis,Atherosclerosis Signaling,Cholecystokinin/Gastrin-mediated Signaling,Communication between Innate and Adaptive Immune Cells,Dendritic Cell Maturation,FXR/RXR Activation,Graft-versus-Host Disease Signaling,Granulocyte Adhesion and Diapedes…
hsa-miR-1260a	miR-1260a (and other miRNAs w/seed UCCCACC)	TargetScan Human	High (predicted)	KCNJ11	Dopamine-DARPP32 Feedback in cAMP Signaling,Gustation Pathway,Insulin Secretion Signaling Pathway,Maturity Onset Diabetes of Young (MODY) Signaling,Type II Diabetes Mellitus Signaling
hsa-miR-1260a	miR-1260a (and other miRNAs w/seed UCCCACC)	TargetScan Human	High (predicted)	KCNJ2	Dopamine-DARPP32 Feedback in cAMP Signaling
hsa-miR-1260a	miR-1260a (and other miRNAs w/seed UCCCACC)	TargetScan Human	High (predicted)	KCNN4	Adrenomedullin signaling pathway,Cellular Effects of Sildenafil (Viagra),GABA Receptor Signaling,Gustation Pathway,Neuropathic Pain Signaling In Dorsal Horn Neurons
hsa-miR-1260a	miR-1260a (and other miRNAs w/seed UCCCACC)	TargetScan Human	High (predicted)	KRT73	Glucocorticoid Receptor Signaling
hsa-miR-1260a	miR-1260a (and other miRNAs w/seed UCCCACC)	TargetScan Human	High (predicted)	LAT2	TREM1 Signaling
hsa-miR-1260a	miR-1260a (and other miRNAs w/seed UCCCACC)	TargetScan Human	High (predicted)	LEP	Adipogenesis pathway,Airway Pathology in Chronic Obstructive Pulmonary Disease,AMPK Signaling,Cardiac Hypertrophy Signaling (Enhanced),Dendritic Cell Maturation,Erythropoietin Signaling Pathway,Estrogen Receptor Signaling,Hepatic Cholestasis,Hepatic Fibrosis / Hepatic Stellate Cell Activation,Hepatic Fibrosis Signaling Pathway,HMGB1 Signaling,IL-17 Signaling,Leptin Signaling in Obesity,Osteoarthr…
hsa-miR-1260a	miR-1260a (and other miRNAs w/seed UCCCACC)	TargetScan Human	High (predicted)	LRRTM2	Synaptogenesis Signaling Pathway
hsa-miR-1260a	miR-1260a (and other miRNAs w/seed UCCCACC)	TargetScan Human	High (predicted)	MAFF	NRF2-mediated Oxidative Stress Response
hsa-miR-1260a	miR-1260a (and other miRNAs w/seed UCCCACC)	TargetScan Human	High (predicted)	MAFG	NRF2-mediated Oxidative Stress Response
hsa-miR-1260a	miR-1260a (and other miRNAs w/seed UCCCACC)	TargetScan Human	High (predicted)	MAFK	NRF2-mediated Oxidative Stress Response
hsa-miR-1260a	miR-1260a (and other miRNAs w/seed UCCCACC)	TargetScan Human	High (predicted)	MAGOH	Spliceosomal Cycle
hsa-miR-1260a	miR-1260a (and other miRNAs w/seed UCCCACC)	TargetScan Human	High (predicted)	MAP3K5	14-3-3-mediated Signaling,4-1BB Signaling in T Lymphocytes,Acute Phase Response Signaling,Apoptosis Signaling,B Cell Receptor Signaling,Cardiac Hypertrophy Signaling,Cardiac Hypertrophy Signaling (Enhanced),CD27 Signaling in Lymphocytes,Death Receptor Signaling,Endoplasmic Reticulum Stress Pathway,FGF Signaling,Germ Cell-Sertoli Cell Junction Signaling,GNRH Signaling,Gα12/13 Signaling,HGF Signali…
hsa-miR-1260a	miR-1260a (and other miRNAs w/seed UCCCACC)	TargetScan Human	High (predicted)	MDM4	ATM Signaling,Cell Cycle: G2/M DNA Damage Checkpoint Regulation,p53 Signaling
hsa-miR-1260a	miR-1260a (and other miRNAs w/seed UCCCACC)	TargetScan Human	High (predicted)	NDRG1	Sirtuin Signaling Pathway
hsa-miR-1260a	miR-1260a (and other miRNAs w/seed UCCCACC)	TargetScan Human	High (predicted)	NFKBIB	4-1BB Signaling in T Lymphocytes,Activation of IRF by Cytosolic Pattern Recognition Receptors,Acute Phase Response Signaling,Angiopoietin Signaling,Antioxidant Action of Vitamin C,Apoptosis Signaling,April Mediated Signaling,B Cell Activating Factor Signaling,B Cell Receptor Signaling,CD27 Signaling in Lymphocytes,CD28 Signaling in T Helper Cells,CD40 Signaling,Coronavirus Pathogenesis Pathway,De…
hsa-miR-1260a	miR-1260a (and other miRNAs w/seed UCCCACC)	TargetScan Human	High (predicted)	NKX6-1	Maturity Onset Diabetes of Young (MODY) Signaling
hsa-miR-1260a	miR-1260a (and other miRNAs w/seed UCCCACC)	TargetScan Human	High (predicted)	NRXN2	Synaptogenesis Signaling Pathway
hsa-miR-1260a	miR-1260a (and other miRNAs w/seed UCCCACC)	TargetScan Human	High (predicted)	NUDT4	3-phosphoinositide Biosynthesis,3-phosphoinositide Degradation,D-myo-inositol (1,4,5,6)-Tetrakisphosphate Biosynthesis,D-myo-inositol (3,4,5,6)-tetrakisphosphate Biosynthesis,D-myo-inositol-5-phosphate Metabolism,Superpathway of Inositol Phosphate Compounds
hsa-miR-1260a	miR-1260a (and other miRNAs w/seed UCCCACC)	TargetScan Human	High (predicted)	OTX1	Transcriptional Regulatory Network in Embryonic Stem Cells
hsa-miR-1260a	miR-1260a (and other miRNAs w/seed UCCCACC)	TargetScan Human	High (predicted)	P2RX6	Gustation Pathway
hsa-miR-1260a	miR-1260a (and other miRNAs w/seed UCCCACC)	TargetScan Human	High (predicted)	PABPN1	Cleavage and Polyadenylation of Pre-mRNA,CSDE1 Signaling Pathway,Inhibition of ARE-Mediated mRNA Degradation Pathway
hsa-miR-1260a	miR-1260a (and other miRNAs w/seed UCCCACC)	TargetScan Human	High (predicted)	PACSIN1	Huntington's Disease Signaling
hsa-miR-1260a	miR-1260a (and other miRNAs w/seed UCCCACC)	TargetScan Human	High (predicted)	PGM5	GDP-glucose Biosynthesis,Glucose and Glucose-1-phosphate Degradation,Glycogen Degradation II,Glycogen Degradation III
hsa-miR-1260a	miR-1260a (and other miRNAs w/seed UCCCACC)	TargetScan Human	High (predicted)	PHF19	Senescence Pathway
hsa-miR-1260a	miR-1260a (and other miRNAs w/seed UCCCACC)	TargetScan Human	High (predicted)	PIN1	Activation of IRF by Cytosolic Pattern Recognition Receptors,WNT/β-catenin Signaling
hsa-miR-1260a	miR-1260a (and other miRNAs w/seed UCCCACC)	TargetScan Human	High (predicted)	PIWIL2	CSDE1 Signaling Pathway
hsa-miR-1260a	miR-1260a (and other miRNAs w/seed UCCCACC)	TargetScan Human	High (predicted)	POLA2	Cell Cycle Control of Chromosomal Replication,NER (Nucleotide Excision Repair, Enhanced Pathway)
hsa-miR-1260a	miR-1260a (and other miRNAs w/seed UCCCACC)	TargetScan Human	High (predicted)	PPP1R8	3-phosphoinositide Biosynthesis,3-phosphoinositide Degradation,D-myo-inositol (1,4,5,6)-Tetrakisphosphate Biosynthesis,D-myo-inositol (3,4,5,6)-tetrakisphosphate Biosynthesis,D-myo-inositol-5-phosphate Metabolism,Role of OCT4 in Mammalian Embryonic Stem Cell Pluripotency,Superpathway of Inositol Phosphate Compounds
hsa-miR-1260a	miR-1260a (and other miRNAs w/seed UCCCACC)	TargetScan Human	High (predicted)	RAB27A	AMPK Signaling
hsa-miR-1260a	miR-1260a (and other miRNAs w/seed UCCCACC)	TargetScan Human	High (predicted)	RNF41	Neuregulin Signaling
hsa-miR-1260a	miR-1260a (and other miRNAs w/seed UCCCACC)	TargetScan Human	High (predicted)	RRM2	Pyrimidine Deoxyribonucleotides De Novo Biosynthesis I
hsa-miR-1260a	miR-1260a (and other miRNAs w/seed UCCCACC)	TargetScan Human	High (predicted)	SEMA3A	Axonal Guidance Signaling,Semaphorin Neuronal Repulsive Signaling Pathway,Semaphorin Signaling in Neurons
hsa-miR-1260a	miR-1260a (and other miRNAs w/seed UCCCACC)	TargetScan Human	High (predicted)	SH2D1A	Natural Killer Cell Signaling
hsa-miR-1260a	miR-1260a (and other miRNAs w/seed UCCCACC)	TargetScan Human	High (predicted)	SLC37A4	Glucocorticoid Receptor Signaling
hsa-miR-1260a	miR-1260a (and other miRNAs w/seed UCCCACC)	TargetScan Human	High (predicted)	SOST	Role of Macrophages, Fibroblasts and Endothelial Cells in Rheumatoid Arthritis,Role of Osteoblasts, Osteoclasts and Chondrocytes in Rheumatoid Arthritis
hsa-miR-1260a	miR-1260a (and other miRNAs w/seed UCCCACC)	TargetScan Human	High (predicted)	SPR	Dopamine Receptor Signaling,Serotonin Receptor Signaling,Tetrahydrobiopterin Biosynthesis I,Tetrahydrobiopterin Biosynthesis II
hsa-miR-1260a	miR-1260a (and other miRNAs w/seed UCCCACC)	TargetScan Human	High (predicted)	SRR	Glycine Betaine Degradation,L-serine Degradation
hsa-miR-1260a	miR-1260a (and other miRNAs w/seed UCCCACC)	TargetScan Human	High (predicted)	SYT2	Synaptogenesis Signaling Pathway,TR/RXR Activation
hsa-miR-1260a	miR-1260a (and other miRNAs w/seed UCCCACC)	TargetScan Human	High (predicted)	TAF5L	Androgen Signaling,Assembly of RNA Polymerase II Complex,Glucocorticoid Receptor Signaling
hsa-miR-1260a	miR-1260a (and other miRNAs w/seed UCCCACC)	TargetScan Human	High (predicted)	TMLHE	Fatty Acid α-oxidation,L-carnitine Biosynthesis
hsa-miR-1260a	miR-1260a (and other miRNAs w/seed UCCCACC)	TargetScan Human	High (predicted)	TRH	TR/RXR Activation
hsa-miR-1260a	miR-1260a (and other miRNAs w/seed UCCCACC)	TargetScan Human	High (predicted)	TRIM25	Coronavirus Pathogenesis Pathway,Role of RIG1-like Receptors in Antiviral Innate Immunity
hsa-miR-1260a	miR-1260a (and other miRNAs w/seed UCCCACC)	TargetScan Human	High (predicted)	UBTF	Assembly of RNA Polymerase I Complex,Role of p14/p19ARF in Tumor Suppression
hsa-miR-1260a	miR-1260a (and other miRNAs w/seed UCCCACC)	TargetScan Human	High (predicted)	WIPF1	Actin Nucleation by ARP-WASP Complex,Axonal Guidance Signaling,CDC42 Signaling,Ephrin Receptor Signaling,Integrin Signaling,Leukocyte Extravasation Signaling,Natural Killer Cell Signaling,Phagosome Formation,Regulation of Actin-based Motility by Rho,Signaling by Rho Family GTPases
hsa-miR-1260a	miR-1260a (and other miRNAs w/seed UCCCACC)	TargetScan Human	High (predicted)	WNT10B	Adipogenesis pathway,Axonal Guidance Signaling,Basal Cell Carcinoma Signaling,Cardiac Hypertrophy Signaling (Enhanced),Colorectal Cancer Metastasis Signaling,Factors Promoting Cardiogenesis in Vertebrates,Glioblastoma Multiforme Signaling,Hepatic Fibrosis Signaling Pathway,HOTAIR Regulatory Pathway,Human Embryonic Stem Cell Pluripotency,Molecular Mechanisms of Cancer,Ovarian Cancer Signaling,PCP …
hsa-miR-132-3p	miR-132-3p (and other miRNAs w/seed AACAGUC)	TargetScan Human	High (predicted)	ANP32A	Granzyme A Signaling
hsa-miR-132-3p	miR-132-3p (and other miRNAs w/seed AACAGUC)	miRecords	Experimentally Observed	CAPN8	Amyloid Processing,Amyotrophic Lateral Sclerosis Signaling,Apoptosis Signaling,FAK Signaling,Huntington's Disease Signaling,Integrin Signaling,Necroptosis Signaling Pathway,nNOS Signaling in Neurons,Regulation of Cellular Mechanics by Calpain Protease,Senescence Pathway
hsa-miR-132-3p	miR-132-3p (and other miRNAs w/seed AACAGUC)	TargetScan Human	High (predicted)	CBLL1	Remodeling of Epithelial Adherens Junctions
hsa-miR-132-3p	miR-132-3p (and other miRNAs w/seed AACAGUC)	TargetScan Human	High (predicted)	CENPQ	Kinetochore Metaphase Signaling Pathway
hsa-miR-132-3p	miR-132-3p (and other miRNAs w/seed AACAGUC)	TargetScan Human	High (predicted)	CFL2	Actin Cytoskeleton Signaling,Axonal Guidance Signaling,B Cell Receptor Signaling,CCR3 Signaling in Eosinophils,CDC42 Signaling,Ephrin A Signaling,Ephrin B Signaling,Ephrin Receptor Signaling,Epithelial Adherens Junction Signaling,Estrogen Receptor Signaling,Germ Cell-Sertoli Cell Junction Signaling,ILK Signaling,Natural Killer Cell Signaling,PAK Signaling,Phagosome Formation,RAC Signaling,RHOA Si…
hsa-miR-132-3p	miR-132-3p (and other miRNAs w/seed AACAGUC)	TargetScan Human	High (predicted)	DYRK4	IL-15 Production,Sperm Motility
hsa-miR-132-3p	miR-132-3p (and other miRNAs w/seed AACAGUC)	TargetScan Human	High (predicted)	E2F5	Bladder Cancer Signaling,Breast Cancer Regulation by Stathmin1,Cell Cycle Regulation by BTG Family Proteins,Cell Cycle: G1/S Checkpoint Regulation,Chronic Myeloid Leukemia Signaling,Coronavirus Pathogenesis Pathway,Cyclins and Cell Cycle Regulation,Estrogen-mediated S-phase Entry,Glioblastoma Multiforme Signaling,Glioma Signaling,Molecular Mechanisms of Cancer,Non-Small Cell Lung Cancer Signaling…
hsa-miR-132-3p	miR-132-3p (and other miRNAs w/seed AACAGUC)	TargetScan Human	High (predicted)	GDF5	Osteoarthritis Pathway
hsa-miR-132-3p	miR-132-3p (and other miRNAs w/seed AACAGUC)	TargetScan Human	High (predicted)	GPR89A/GPR89B	Breast Cancer Regulation by Stathmin1,CREB Signaling in Neurons,Phagosome Formation
hsa-miR-132-3p	miR-132-3p (and other miRNAs w/seed AACAGUC)	TargetScan Human	High (predicted)	GRM3	Breast Cancer Regulation by Stathmin1,cAMP-mediated signaling,CREB Signaling in Neurons,G-Protein Coupled Receptor Signaling,Glutamate Receptor Signaling,Gαi Signaling,Neuropathic Pain Signaling In Dorsal Horn Neurons,Phagosome Formation,Synaptic Long Term Depression,Synaptic Long Term Potentiation,Synaptogenesis Signaling Pathway
hsa-miR-132-3p	miR-132-3p (and other miRNAs w/seed AACAGUC)	TargetScan Human	High (predicted)	GTF2H1	Adipogenesis pathway,Androgen Signaling,Assembly of RNA Polymerase II Complex,Glucocorticoid Receptor Signaling,NER (Nucleotide Excision Repair, Enhanced Pathway),Nucleotide Excision Repair Pathway,RAR Activation
hsa-miR-132-3p	miR-132-3p (and other miRNAs w/seed AACAGUC)	TargetScan Human	High (predicted)	H2AZ1	Ferroptosis Signaling Pathway,Kinetochore Metaphase Signaling Pathway
hsa-miR-132-3p	miR-132-3p (and other miRNAs w/seed AACAGUC)	TargetScan Human	High (predicted)	HEXB	Chondroitin Sulfate Degradation (Metazoa),Dermatan Sulfate Degradation (Metazoa)
hsa-miR-132-3p	miR-132-3p (and other miRNAs w/seed AACAGUC)	miRecords	Experimentally Observed	MECP2	DNA Methylation and Transcriptional Repression Signaling
hsa-miR-132-3p	miR-132-3p (and other miRNAs w/seed AACAGUC)	TargetScan Human	High (predicted)	MIS12	Kinetochore Metaphase Signaling Pathway
hsa-miR-132-3p	miR-132-3p (and other miRNAs w/seed AACAGUC)	miRecords	Experimentally Observed	MMP9	Agranulocyte Adhesion and Diapedesis,Airway Inflammation in Asthma,Airway Pathology in Chronic Obstructive Pulmonary Disease,Atherosclerosis Signaling,Axonal Guidance Signaling,Bladder Cancer Signaling,Breast Cancer Regulation by Stathmin1,Colorectal Cancer Metastasis Signaling,Estrogen Receptor Signaling,Glioma Invasiveness Signaling,Glucocorticoid Receptor Signaling,Granulocyte Adhesion and Dia…
hsa-miR-132-3p	miR-132-3p (and other miRNAs w/seed AACAGUC)	TargetScan Human	High (predicted)	MRM2	Cysteine Biosynthesis III (mammalia),Methionine Degradation I (to Homocysteine),Superpathway of Methionine Degradation
hsa-miR-132-3p	miR-132-3p (and other miRNAs w/seed AACAGUC)	TargetScan Human	High (predicted)	NDUFA5	Estrogen Receptor Signaling,Glucocorticoid Receptor Signaling,Mitochondrial Dysfunction,Oxidative Phosphorylation,Sirtuin Signaling Pathway
hsa-miR-132-3p	miR-132-3p (and other miRNAs w/seed AACAGUC)	TargetScan Human	High (predicted)	NFE2L2	Aryl Hydrocarbon Receptor Signaling,Ferroptosis Signaling Pathway,Neuroinflammation Signaling Pathway,NRF2-mediated Oxidative Stress Response,Sirtuin Signaling Pathway,Unfolded protein response,Xenobiotic Metabolism General Signaling Pathway,Xenobiotic Metabolism Signaling
hsa-miR-132-3p	miR-132-3p (and other miRNAs w/seed AACAGUC)	TargetScan Human	High (predicted)	PAIP2	Regulation of eIF4 and p70S6K Signaling
hsa-miR-132-3p	miR-132-3p (and other miRNAs w/seed AACAGUC)	TargetScan Human	High (predicted)	PSMA2	BAG2 Signaling Pathway,FAT10 Signaling Pathway,Huntington's Disease Signaling,Inhibition of ARE-Mediated mRNA Degradation Pathway,Polyamine Regulation in Colon Cancer,Protein Ubiquitination Pathway
hsa-miR-132-3p	miR-132-3p (and other miRNAs w/seed AACAGUC)	TargetScan Human	High (predicted)	PSMD12	BAG2 Signaling Pathway,FAT10 Signaling Pathway,Huntington's Disease Signaling,Inhibition of ARE-Mediated mRNA Degradation Pathway,Polyamine Regulation in Colon Cancer,Protein Ubiquitination Pathway
hsa-miR-132-3p	miR-132-3p (and other miRNAs w/seed AACAGUC)	Ingenuity Expert Findings	Experimentally Observed	PTEN	3-phosphoinositide Biosynthesis,3-phosphoinositide Degradation,Autophagy,B Cell Receptor Signaling,BEX2 Signaling Pathway,Cancer Drug Resistance By Drug Efflux,Cardiac Hypertrophy Signaling (Enhanced),CSDE1 Signaling Pathway,D-myo-inositol (1,3,4)-trisphosphate Biosynthesis,D-myo-inositol (1,4,5,6)-Tetrakisphosphate Biosynthesis,D-myo-inositol (3,4,5,6)-tetrakisphosphate Biosynthesis,D-myo-inosit…
hsa-miR-132-3p	miR-132-3p (and other miRNAs w/seed AACAGUC)	TargetScan Human	High (predicted)	RASA1	3-phosphoinositide Biosynthesis,3-phosphoinositide Degradation,Angiopoietin Signaling,Axonal Guidance Signaling,CDC42 Signaling,D-myo-inositol (1,4,5,6)-Tetrakisphosphate Biosynthesis,D-myo-inositol (3,4,5,6)-tetrakisphosphate Biosynthesis,D-myo-inositol-5-phosphate Metabolism,EGF Signaling,Ephrin Receptor Signaling,G-Protein Coupled Receptor Signaling,GDNF Family Ligand-Receptor Interactions,Gα1…
hsa-miR-132-3p	miR-132-3p (and other miRNAs w/seed AACAGUC)	Ingenuity Expert Findings,TargetScan Human	Experimentally Observed,High (predicted)	RB1	Adipogenesis pathway,Antiproliferative Role of TOB in T Cell Signaling,Aryl Hydrocarbon Receptor Signaling,Bladder Cancer Signaling,Cell Cycle Regulation by BTG Family Proteins,Cell Cycle: G1/S Checkpoint Regulation,Chronic Myeloid Leukemia Signaling,Coronavirus Pathogenesis Pathway,Cyclins and Cell Cycle Regulation,Estrogen-mediated S-phase Entry,Ferroptosis Signaling Pathway,Glioblastoma Multif…
hsa-miR-132-3p	miR-132-3p (and other miRNAs w/seed AACAGUC)	TargetScan Human	High (predicted)	RPL31	EIF2 Signaling
hsa-miR-132-3p	miR-132-3p (and other miRNAs w/seed AACAGUC)	TargetScan Human	High (predicted)	SAP30L	Adipogenesis pathway
hsa-miR-132-3p	miR-132-3p (and other miRNAs w/seed AACAGUC)	TargetScan Human	High (predicted)	SIRT1	Adipogenesis pathway,AMPK Signaling,Autophagy,NAD Signaling Pathway,Osteoarthritis Pathway,p53 Signaling,Senescence Pathway,Sirtuin Signaling Pathway,Sumoylation Pathway,White Adipose Tissue Browning Pathway
hsa-miR-132-3p	miR-132-3p (and other miRNAs w/seed AACAGUC)	TargetScan Human	High (predicted)	SLC6A1	GABA Receptor Signaling,Neuroinflammation Signaling Pathway
hsa-miR-132-3p	miR-132-3p (and other miRNAs w/seed AACAGUC)	Ingenuity Expert Findings,TargetScan Human	Experimentally Observed,Moderate (predicted)	SOX4	WNT/β-catenin Signaling
hsa-miR-132-3p	miR-132-3p (and other miRNAs w/seed AACAGUC)	TargetScan Human	High (predicted)	SOX5	WNT/β-catenin Signaling
hsa-miR-132-3p	miR-132-3p (and other miRNAs w/seed AACAGUC)	TargetScan Human	High (predicted)	TGFB2	Airway Inflammation in Asthma,Airway Pathology in Chronic Obstructive Pulmonary Disease,Antiproliferative Role of TOB in T Cell Signaling,Apelin Cardiac Fibroblast Signaling Pathway,Aryl Hydrocarbon Receptor Signaling,Autophagy,Breast Cancer Regulation by Stathmin1,Cardiac Hypertrophy Signaling,Cardiac Hypertrophy Signaling (Enhanced),Cell Cycle: G1/S Checkpoint Regulation,Chronic Myeloid Leukemi…
hsa-miR-132-3p	miR-132-3p (and other miRNAs w/seed AACAGUC)	TargetScan Human	High (predicted)	TIMM9	Necroptosis Signaling Pathway,Sirtuin Signaling Pathway
hsa-miR-132-3p	miR-132-3p (and other miRNAs w/seed AACAGUC)	TargetScan Human	High (predicted)	TJAP1	Sertoli Cell-Sertoli Cell Junction Signaling
hsa-miR-132-3p	miR-132-3p (and other miRNAs w/seed AACAGUC)	miRecords	Experimentally Observed	TJP1	Gap Junction Signaling,Germ Cell-Sertoli Cell Junction Signaling,Sertoli Cell-Sertoli Cell Junction Signaling,Tight Junction Signaling
hsa-miR-132-3p	miR-132-3p (and other miRNAs w/seed AACAGUC)	TargetScan Human	High (predicted)	TTK	Kinetochore Metaphase Signaling Pathway,Pyridoxal 5'-phosphate Salvage Pathway,Salvage Pathways of Pyrimidine Ribonucleotides
hsa-miR-132-3p	miR-132-3p (and other miRNAs w/seed AACAGUC)	TargetScan Human	High (predicted)	USP38	Protein Ubiquitination Pathway
hsa-miR-486-5p	miR-486-5p (and other miRNAs w/seed CCUGUAC)	Ingenuity Expert Findings,TargetScan Human	Experimentally Observed,Moderate (predicted)	ARID4B	DNA Methylation and Transcriptional Repression Signaling
hsa-miR-486-5p	miR-486-5p (and other miRNAs w/seed CCUGUAC)	TargetScan Human	High (predicted)	BCAS2	Spliceosomal Cycle
hsa-miR-486-5p	miR-486-5p (and other miRNAs w/seed CCUGUAC)	TargetScan Human	High (predicted)	CD247	Allograft Rejection Signaling,Altered T Cell and B Cell Signaling in Rheumatoid Arthritis,Antiproliferative Role of TOB in T Cell Signaling,Autoimmune Thyroid Disease Signaling,Calcium-induced T Lymphocyte Apoptosis,CCR5 Signaling in Macrophages,CD28 Signaling in T Helper Cells,CDC42 Signaling,Communication between Innate and Adaptive Immune Cells,CTLA4 Signaling in Cytotoxic T Lymphocytes,Cytoto…
hsa-miR-486-5p	miR-486-5p (and other miRNAs w/seed CCUGUAC)	TargetScan Human	High (predicted)	CDKN2B	Cell Cycle: G1/S Checkpoint Regulation,Cyclins and Cell Cycle Regulation,Glioma Signaling,Molecular Mechanisms of Cancer,Pancreatic Adenocarcinoma Signaling,Senescence Pathway,Small Cell Lung Cancer Signaling
hsa-miR-486-5p	miR-486-5p (and other miRNAs w/seed CCUGUAC)	TargetScan Human	High (predicted)	CRLS1	CDP-diacylglycerol Biosynthesis I,Phosphatidylglycerol Biosynthesis II (Non-plastidic),Triacylglycerol Biosynthesis
hsa-miR-486-5p	miR-486-5p (and other miRNAs w/seed CCUGUAC)	TargetScan Human	High (predicted)	CSPG5	Semaphorin Neuronal Repulsive Signaling Pathway
hsa-miR-486-5p	miR-486-5p (and other miRNAs w/seed CCUGUAC)	TargetScan Human	High (predicted)	CSTF1	Cleavage and Polyadenylation of Pre-mRNA,Tight Junction Signaling
hsa-miR-486-5p	miR-486-5p (and other miRNAs w/seed CCUGUAC)	TargetScan Human	High (predicted)	CTSK	Phagosome Maturation,Role of Osteoblasts, Osteoclasts and Chondrocytes in Rheumatoid Arthritis
hsa-miR-486-5p	miR-486-5p (and other miRNAs w/seed CCUGUAC)	TargetScan Human	High (predicted)	DHFR2	dTMP De Novo Biosynthesis
hsa-miR-486-5p	miR-486-5p (and other miRNAs w/seed CCUGUAC)	TargetScan Human	High (predicted)	DNAJC19	Aldosterone Signaling in Epithelial Cells,NRF2-mediated Oxidative Stress Response,Protein Ubiquitination Pathway,Unfolded protein response
hsa-miR-486-5p	miR-486-5p (and other miRNAs w/seed CCUGUAC)	TargetScan Human	High (predicted)	EHHADH	Fatty Acid β-oxidation I,Fatty Acid β-oxidation III (Unsaturated, Odd Number),Glutaryl-CoA Degradation,Isoleucine Degradation I,Tryptophan Degradation III (Eukaryotic),Valine Degradation I
hsa-miR-486-5p	miR-486-5p (and other miRNAs w/seed CCUGUAC)	TargetScan Human	High (predicted)	EMP1	Ferroptosis Signaling Pathway
hsa-miR-486-5p	miR-486-5p (and other miRNAs w/seed CCUGUAC)	TargetScan Human	High (predicted)	FGF7	Actin Cytoskeleton Signaling,Airway Pathology in Chronic Obstructive Pulmonary Disease,Bladder Cancer Signaling,Cardiac Hypertrophy Signaling (Enhanced),Clathrin-mediated Endocytosis Signaling,FGF Signaling,Regulation Of The Epithelial Mesenchymal Transition By Growth Factors Pathway,Regulation of the Epithelial-Mesenchymal Transition Pathway,Tumor Microenvironment Pathway
hsa-miR-486-5p	miR-486-5p (and other miRNAs w/seed CCUGUAC)	Ingenuity Expert Findings,TargetScan Human	Experimentally Observed,High (predicted)	FOXO1	14-3-3-mediated Signaling,Adipogenesis pathway,AMPK Signaling,Angiopoietin Signaling,Autophagy,B Cell Receptor Signaling,Cancer Drug Resistance By Drug Efflux,Cell Cycle: G1/S Checkpoint Regulation,Docosahexaenoic Acid (DHA) Signaling,ERB2-ERBB3 Signaling,ERBB Signaling,Estrogen Receptor Signaling,FXR/RXR Activation,Glioblastoma Multiforme Signaling,Hepatic Fibrosis Signaling Pathway,HER-2 Signal…
hsa-miR-486-5p	miR-486-5p (and other miRNAs w/seed CCUGUAC)	TargetScan Human	High (predicted)	GPR78	Breast Cancer Regulation by Stathmin1,CREB Signaling in Neurons,Phagosome Formation
hsa-miR-486-5p	miR-486-5p (and other miRNAs w/seed CCUGUAC)	TargetScan Human	High (predicted)	GPX8	Apelin Adipocyte Signaling Pathway,Glutathione Redox Reactions I
hsa-miR-486-5p	miR-486-5p (and other miRNAs w/seed CCUGUAC)	TargetScan Human	High (predicted)	KLK2	Intrinsic Prothrombin Activation Pathway,MSP-RON Signaling In Cancer Cells Pathway,MSP-RON Signaling In Macrophages Pathway,MSP-RON Signaling Pathway,SPINK1 Pancreatic Cancer Pathway
hsa-miR-486-5p	miR-486-5p (and other miRNAs w/seed CCUGUAC)	TargetScan Human	High (predicted)	LILRB4	Systemic Lupus Erythematosus In B Cell Signaling Pathway
hsa-miR-486-5p	miR-486-5p (and other miRNAs w/seed CCUGUAC)	TargetScan Human	High (predicted)	LMTK2	IL-15 Production,Sperm Motility
hsa-miR-486-5p	miR-486-5p (and other miRNAs w/seed CCUGUAC)	TargetScan Human	High (predicted)	MDH1	Aspartate Degradation II,Gluconeogenesis I,TCA Cycle II (Eukaryotic)
hsa-miR-486-5p	miR-486-5p (and other miRNAs w/seed CCUGUAC)	TargetScan Human	High (predicted)	MRAS	14-3-3-mediated Signaling,Actin Cytoskeleton Signaling,Actin Nucleation by ARP-WASP Complex,Acute Myeloid Leukemia Signaling,Acute Phase Response Signaling,Adrenomedullin signaling pathway,Agrin Interactions at Neuromuscular Junction,AMPK Signaling,Androgen Signaling,Angiopoietin Signaling,Antiproliferative Role of Somatostatin Receptor 2,Apelin Endothelial Signaling Pathway,Apelin Muscle Signali…
hsa-miR-486-5p	miR-486-5p (and other miRNAs w/seed CCUGUAC)	TargetScan Human	High (predicted)	NEK2	Kinetochore Metaphase Signaling Pathway,Pyridoxal 5'-phosphate Salvage Pathway,Salvage Pathways of Pyrimidine Ribonucleotides
hsa-miR-486-5p	miR-486-5p (and other miRNAs w/seed CCUGUAC)	TargetScan Human	High (predicted)	PARP2	Death Receptor Signaling,NAD Signaling Pathway,Retinoic acid Mediated Apoptosis Signaling,UVA-Induced MAPK Signaling
hsa-miR-486-5p	miR-486-5p (and other miRNAs w/seed CCUGUAC)	TargetScan Human	High (predicted)	PDGFC	Actin Cytoskeleton Signaling,Amyotrophic Lateral Sclerosis Signaling,Atherosclerosis Signaling,Axonal Guidance Signaling,BEX2 Signaling Pathway,Bladder Cancer Signaling,Breast Cancer Regulation by Stathmin1,Clathrin-mediated Endocytosis Signaling,Colorectal Cancer Metastasis Signaling,Endocannabinoid Cancer Inhibition Pathway,eNOS Signaling,Ephrin Receptor Signaling,Estrogen Receptor Signaling,Gl…
hsa-miR-486-5p	miR-486-5p (and other miRNAs w/seed CCUGUAC)	TargetScan Human	High (predicted)	PIM1	Acute Myeloid Leukemia Signaling,GM-CSF Signaling,Pyridoxal 5'-phosphate Salvage Pathway,Salvage Pathways of Pyrimidine Ribonucleotides,STAT3 Pathway
hsa-miR-486-5p	miR-486-5p (and other miRNAs w/seed CCUGUAC)	TargetScan Human	High (predicted)	PLA1A	Heparan Sulfate Biosynthesis,Heparan Sulfate Biosynthesis (Late Stages),Phospholipases,Triacylglycerol Degradation
hsa-miR-486-5p	miR-486-5p (and other miRNAs w/seed CCUGUAC)	Ingenuity Expert Findings,TargetScan Human	Experimentally Observed,Moderate (predicted)	PTEN	3-phosphoinositide Biosynthesis,3-phosphoinositide Degradation,Autophagy,B Cell Receptor Signaling,BEX2 Signaling Pathway,Cancer Drug Resistance By Drug Efflux,Cardiac Hypertrophy Signaling (Enhanced),CSDE1 Signaling Pathway,D-myo-inositol (1,3,4)-trisphosphate Biosynthesis,D-myo-inositol (1,4,5,6)-Tetrakisphosphate Biosynthesis,D-myo-inositol (3,4,5,6)-tetrakisphosphate Biosynthesis,D-myo-inosit…
hsa-miR-486-5p	miR-486-5p (and other miRNAs w/seed CCUGUAC)	TargetScan Human	High (predicted)	PTGDR	Breast Cancer Regulation by Stathmin1,cAMP-mediated signaling,CREB Signaling in Neurons,Eicosanoid Signaling,G-Protein Coupled Receptor Signaling,Gαs Signaling,Phagosome Formation
hsa-miR-486-5p	miR-486-5p (and other miRNAs w/seed CCUGUAC)	TargetScan Human	High (predicted)	PYCR2	Arginine Degradation VI (Arginase 2 Pathway),Proline Biosynthesis I,Proline Biosynthesis II (from Arginine)
hsa-miR-486-5p	miR-486-5p (and other miRNAs w/seed CCUGUAC)	TargetScan Human	High (predicted)	RCOR3	Huntington's Disease Signaling
hsa-miR-486-5p	miR-486-5p (and other miRNAs w/seed CCUGUAC)	TargetScan Human	High (predicted)	RFC2	BER (Base Excision Repair) Pathway,Hereditary Breast Cancer Signaling,Mismatch Repair in Eukaryotes,NER (Nucleotide Excision Repair, Enhanced Pathway),Role of BRCA1 in DNA Damage Response,Role of CHK Proteins in Cell Cycle Checkpoint Control,Sumoylation Pathway
hsa-miR-486-5p	miR-486-5p (and other miRNAs w/seed CCUGUAC)	TargetScan Human	High (predicted)	SELENOT	Antioxidant Action of Vitamin C,Thioredoxin Pathway,Vitamin-C Transport
hsa-miR-486-5p	miR-486-5p (and other miRNAs w/seed CCUGUAC)	TargetScan Human	High (predicted)	SLC38A1	Ferroptosis Signaling Pathway,Glutamate Receptor Signaling
hsa-miR-486-5p	miR-486-5p (and other miRNAs w/seed CCUGUAC)	TargetScan Human	High (predicted)	SNRPD1	Systemic Lupus Erythematosus Signaling
hsa-miR-486-5p	miR-486-5p (and other miRNAs w/seed CCUGUAC)	TargetScan Human	High (predicted)	TOB1	Antiproliferative Role of TOB in T Cell Signaling,Regulation of IL-2 Expression in Activated and Anergic T Lymphocytes
hsa-miR-486-5p	miR-486-5p (and other miRNAs w/seed CCUGUAC)	Ingenuity Expert Findings,TargetScan Human	Experimentally Observed,High (predicted)	TWF1	IL-15 Production,Sperm Motility
hsa-miR-486-5p	miR-486-5p (and other miRNAs w/seed CCUGUAC)	TargetScan Human	High (predicted)	VTI1A	Huntington's Disease Signaling,Insulin Secretion Signaling Pathway,Phagosome Maturation,Synaptogenesis Signaling Pathway,Tight Junction Signaling
hsa-miR-486-5p	miR-486-5p (and other miRNAs w/seed CCUGUAC)	TargetScan Human	High (predicted)	ZNF331	Inhibition of ARE-Mediated mRNA Degradation Pathway
